# Supplementary material
Source: MDPI journal article supplement (https://www.mdpi.com/2073-4395/13/2/334)
Supplement: s1 [file s1]

**Table S1:** EST-STS markers specific for chromosome 1P from *A. cristatum* used in this study.

| Oligo Name | Amplification in<br><i>A. cristatum</i> | Polimorphic/Non<br>polimorphic | Amplification in<br>CS+1P | Amplification in<br>TH4 line | Sequence 5' to 3'- Forward | Sequence 5' to 3'- Reverse | Genetic<br>distance(cM)<br>Zhang et al (2017)<br>[30] | Location in <i>A.</i><br><i>cristatum</i> (this<br>work) | Tm   |
|------------|-----------------------------------------|--------------------------------|---------------------------|------------------------------|----------------------------|----------------------------|-------------------------------------------------------|----------------------------------------------------------|------|
| AgC508     | Yes                                     | No                             |                           |                              | GTGAGGTTCTTGGTCCGGAT       | TGCGTCTAGAGGAATGCTGTTG     | 64,04                                                 |                                                          | 59°C |
| AgC2186    | Yes                                     | Yes                            | Yes                       | No                           | GGGAACCTCCTCACAGGAGAAA     | CCAGGAATTGCAAATTGAACTC     | 44,41                                                 | 1PL                                                      | 59°C |
| AgC3994    | Yes                                     | Yes                            | Yes                       | No                           | TTGGTCTGCTTGATATGGA        | CGGAGTGCAACTGACATGAT       | 64,04                                                 | 1PL                                                      | 59°C |
| AgC4588    | No                                      |                                |                           |                              | GGACGCTAACCATGAAGGAA       | ACAGGGCCATAGGATTGTTG       | 1,96                                                  |                                                          | 59°C |
| AgC5870    | Yes                                     | Yes                            | Yes                       | Yes                          | TCACCCAGTCCCTGAAAAAG       | AGCGTCGAATTAAGGAGCAA       | 16,72                                                 | 1PS                                                      | 59°C |
| AgC6462    | No                                      |                                |                           |                              | GTGTCCGAGACATATGTTTCAAAG   | GAAATCCCCCAGCAGTGATG       | 16,72                                                 |                                                          | 59°C |
| AgC9510    | No                                      |                                |                           |                              | CTCTCCTATGGCGGTGTTTC       | ATTGCCACTGTTGTGCTTCA       | 2,44                                                  |                                                          | 59°C |
| AgC10165   | Yes                                     | No                             |                           |                              | ATTCTGACTTGTGGGCACCT       | ATTGCCACTGTTGTGCTTCA       | 37,42                                                 |                                                          | 59°C |
| AgC11754   | Yes                                     | No                             |                           |                              | GCCTCGTACCCGTTTGG          | CTTGCTGTCTCGCACGTATG       | 64,04                                                 |                                                          | 59°C |
| AgC14448   | Yes                                     | No                             |                           |                              | TTGAACAACTGCGGACTGAC       | AGATTTGGGGCTTAGGGTGT       | 64,04                                                 |                                                          | 59°C |
| AgC14895   | Yes                                     | No                             |                           |                              | TCGATGGTGCATGAGTGTATC      | CATCTGAGCACAAAGCAGAGC      | 37,42                                                 |                                                          | 59°C |
| AgC22989   | Yes                                     | Yes                            | No                        | No                           | GTCCTCCCGGCCAGTGTT         | CCCTGCAGCAGCAGGTACAA       | 37,42                                                 | non in 1P                                                | 59°C |
| AgC23234   | Yes                                     | No                             |                           |                              | TCAAGTTACCCCTTCCCTTCTGA    | CCATCTTATACATTGGATCCGTTG   | 63,12                                                 |                                                          | 59°C |
| AgC24325   | Yes                                     | No                             |                           |                              | AGTCCACCAAACCAACAAT        | AGCTGGATGATGTTGCTTGT       | 25,35                                                 |                                                          | 59°C |
| AgC24754   | Yes                                     | No                             |                           |                              | GCGGAGTCAAGGTTCCGAAT       | TCACCTCTCACGTCGCAAAC       | 16,72                                                 |                                                          | 59°C |
| AgC26797   | Yes                                     | Yes                            | Yes                       | Yes                          | CTGCGTAATTTTCGTCCCTCG      | CCGGCTGTTGATGCTCTTAC       | 64,04                                                 | 1PS                                                      | 59°C |
| AgC27774   | Yes                                     | Yes                            | Yes                       | Yes                          | ACTACGGACAGCCATTTGC        | CAACTCCACTGGACTCGACA       | 64,04                                                 | 1PS                                                      | 59°C |
| AgC29588   | Yes                                     | Yes                            | Yes                       | Yes                          | CCTGTTTGCCAATAAGCCAG       | ATGACACCCTAAGTGATCTCC      | 25,35                                                 | 1PS                                                      | 59°C |
| AgC31531   | Yes                                     | No                             |                           |                              | TGATCTCTCTCCACCTTAC        | CGTTGTGGATCACCCTGAA        | 37,42                                                 |                                                          | 59°C |
| AgC32962   | No                                      |                                |                           |                              | TGCCATCGTCCTCGTCGT         | CAACAAGCAGGTCTCCGTGG       | 64,04                                                 |                                                          | 59°C |
| AgC64023   | Yes                                     | Yes                            | Yes                       | Yes                          | GAGTGCACCTGCCTGTTGAA       | CAGGCTCTGGATACTTCACACC     | 35,21                                                 | 1PS                                                      | 59°C |
| AgC69388   | Yes                                     | No                             |                           |                              | GCCATCATGGCGGTTGTC         | GCGGTGCGCTGAATAAGTAC       | 25,35                                                 |                                                          | 59°C |
| AgC65467   | No                                      |                                |                           |                              | TGGCAAAATCTAGAGTGGCA       | TTTGCTGCTGGAATGTTCTG       | 55,37                                                 |                                                          | 59°C |
| AgC65483   | Yes                                     | No                             |                           |                              | CAGCAAAGAAGGGACTGGAG       | TTCCCGATCTCCAAGTTACG       | 78,56                                                 |                                                          | 59°C |
| AgC68983   | Yes                                     | Yes                            | Yes                       | No                           | ACAACCGCCATAAAGGCTAA       | CAAGCCAGTCAAGAACACGA       | 147,25                                                | 1PL                                                      | 59°C |
| AgC69174   | Yes                                     | Yes                            | Yes                       | Yes                          | TGACGCAGAAAGGACTGTTG       | CTGCCAGCTCAAAATCTTC        | 8,94                                                  | 1PS                                                      | 59°C |
| AgC70948   | Yes                                     | No                             |                           |                              | CCTCCACCACTACCATTGCT       | CTGGGGGCACAATTCTTCTA       | 80,36                                                 |                                                          | 59°C |
| AgC72725   | Yes                                     | No                             |                           |                              | GTGAACAGGTCTCAGCACGA       | GCCTCACAGTGCAAGCATAA       | 40,67                                                 |                                                          | 59°C |
