# Supplementary material
Source: MDPI journal article supplement (https://www.mdpi.com/2073-4395/13/2/334)
Supplement: s1 [file s1]

**Table S2:** Molecular markers used to detect wheat 1BS chromosome arm.

| Marker                   | Polimorphic/Non<br>polimorphic | Physical position (Mb)<br>Zhao et al. (2019) [31] | 1BS chromosome deletion bins<br>(Raats et al. 2013) [32] | Oligo Sequence 5' to 3' (Forward) | Oligo Sequence 5' to 3' (Reverse) | Reference                                       |
|--------------------------|--------------------------------|---------------------------------------------------|----------------------------------------------------------|-----------------------------------|-----------------------------------|-------------------------------------------------|
| <i>GluB3a</i>            | Yes                            | 6,436713                                          | -                                                        | CACAAGCATCAAAACCAAGA              | TGGCACACTAGTGGTGCTC               | Wang et al. (2009) [33]                         |
| <i>GluB3b</i>            | no amplification               | -                                                 | -                                                        | ATCAGGTGTAAAAGTGATAG              | TGCTACATCGACATATCCA               | Wang et al. (2009) [33]                         |
| <i>GluB3c</i>            | no amplification               | -                                                 | -                                                        | CAAATGTTGCAGCAGAGA                | CATATCCATCGACTAAACAAA             | Wang et al. (2009) [33]                         |
| <i>Xpsp3000 (Gli-B1)</i> | Yes                            | 5,137914                                          | 5_1BS.sat18-0.50-1.00                                    | GCAGACCTGTGTCTATTGGTC             | GATATAGTGGCAGCAGGATACG            | Devos et al. 1995; Howell et al. (2014) [34,35] |
| <i>Xgpcw1143</i>         | No                             | -                                                 | 5_1BS.sat18-0.50-1.00                                    | CTGTTGTGGGGTGTGCATGT              | CCCCAGCAGCATGAATAAGT              | Sourdille et al. (2004) [36]                    |
| <i>Xwmc798</i>           | Yes                            | -                                                 | 5_1BS.sat18-0.50-1.00                                    | GTGTGGTAGTGTAGCTGCCAAAAG          | GTTAGCATGGCACATAGAAGCAG           | Somers et al. (2004) [37]                       |
| <i>Xbarc8</i>            | No                             | -                                                 | 4_1BS9-0.84-sat-1.00                                     | GCGGGAATCATGCATAGGAAAACAGAA       | CGGGGGCGAAACATACACATAAAAAACA      | Somers et al. (2004) [37]                       |
| <i>Xcfa2241</i>          | No                             | -                                                 | 4_1BS9-0.84-sat-1.00                                     | TTGGCCATCAGGCTCTAGTT              | GTGATGCTGTTCTCAAGCCA              | Sourdille et al. (2004) [36]                    |
| <i>Xwmc406</i>           | Yes                            | 38,575713                                         | 4_1BS9-0.84-sat-1.00                                     | TATGAGGGTCGGATCAATACAA            | CGAGTTTACTGCAAAACAAATGG           | Somers et al. (2004) [37]                       |
| <i>Xgwm413</i>           | Yes                            | 73,13503                                          | 4_1BS9-0.84-sat-1.00                                     | TGCTTGCTAGATTGCTTGGG              | GATCGTCTCGTCTTGCA                 | Röder et al. (1998) [38]                        |
| <i>Xwmc230</i>           | Yes                            | -                                                 | 4_1BS9-0.84-sat-1.00                                     | AGAAGCGAGCAGGTGTGTTTGA            | CTGCTTCCTCCCAACAGATG              | Somers et al. (2004) [37]                       |
| <i>Xwmc619</i>           | Yes                            | 65,283285                                         | 4_1BS9-0.84-sat-1.00                                     | TTCCCTTTCCCTCTTTCCG               | TACAATCGCCACGAGCACCT              | Somers et al. (2004) [37]                       |
| <i>Xgpcw1143</i>         | No                             | -                                                 | 3_1BS9-0.84-1.06                                         | CTGTTGTGGGGTGTGCATGT              | CCCCAGCAGCATGAATAAGT              | Sourdille et al. (2004) [36]                    |
| <i>Xgwm18</i>            | No                             | -                                                 | 3_1BS9-0.84-1.06                                         | TGGCGCCATGATTGCATTATCTTC          | GGTTGCTGAAGAACCTTATTTAGG          | Somers et al. (2004) [37]                       |
| <i>Xgwm273</i>           | Yes                            | 212,510089                                        | 1_C-1BS-0.50                                             | ATTGACGGACAGATGCTTT               | AGCAGTGAGGAAGGGGATC'              | Röder et al. (1998) [38]                        |
| <i>Xwmc277</i>           | No                             | -                                                 | 1_C-1BS-0.50                                             | CATAGTGTGACCAACTACGAAC            | GTGTGCTAACCTCTATAGTGTG            | Somers et al. (2004) [37]                       |
| <i>Xgpcw1239</i>         | No                             | -                                                 | -                                                        | TCGCCTTTACTACGGAGTGG              | AACAATCGACCAACAAAGCC              | Sourdille et al. (2004) [36]                    |
| <i>Xgpcw3013</i>         | No                             | -                                                 | -                                                        | GGAGGAGAAGGAAGCAAAGG              | AGATTCATAACATACATGGGCG            | Sourdille et al. (2004) [36]                    |
| <i>Xgwm11</i>            | Yes                            | 216,036361                                        | -                                                        | GGATAGTCAGACAATCTTGTG             | GTGAATTGTGCTTGTATGCTTCC           | Röder et al. (1998) [38]                        |
| <i>Xwmc31</i>            | No                             | -                                                 | -                                                        | GTTACACGGTGATGACTCCCA             | CTGTTGCTTGCTCTGCACCCCTT           | Somers et al. (2004) [37]                       |
| <i>Xwmc49</i>            | No                             | -                                                 | -                                                        | CTCATGAGTATATCACCACACA            | GACGCGAAACGAATATTCAGT             | Somers et al. (2004) [37]                       |
| <i>Xwmc128</i>           | No                             | -                                                 | -                                                        | CGGACAGCTACTGCTCTCTTA             | CTGTTGCTTGCTCTGCACCCCTT           | Somers et al. (2004) [37]                       |
