# Supplementary material
Source: MDPI journal article supplement (https://www.mdpi.com/2073-4395/13/2/334)
Supplement: s1 [file s1]

| BC <sub>1</sub> F <sub>2</sub> plant | 1BS markers |         |         |         |         |         |         |        |                    | 1PS markers |         |          |          |          |          | 1PS introgression       |
|--------------------------------------|-------------|---------|---------|---------|---------|---------|---------|--------|--------------------|-------------|---------|----------|----------|----------|----------|-------------------------|
|                                      | Xgwm11      | Xgwm273 | Xgwm413 | Xwmc619 | Xwmc230 | Xwmc406 | Xwmc798 | GluB3a | Xpsp-3000 (Gli-B1) | AgC69174    | AgC5870 | AgC29588 | AgC64023 | AgC26797 | AgC27774 |                         |
| 1                                    | -           | -       | -       | -       | -       | -       | -       | -      | -                  | +           | +       | +        | +        | +        | +        | Yes (2T-1PS-1BL)        |
| 2                                    | +           | +       | +       | +       | +       | +       | +       | -      | -                  | +           | +       | +        | +        | +        | +        | Yes, RECOMBINANT type 1 |
| 3                                    | +           | +       | +       | +       | +       | +       | +       | -      | -                  | +           | +       | +        | +        | +        | +        | Yes (2T-1PS-1BL)        |
| 4                                    | +           | +       | +       | +       | +       | +       | +       | +      | +                  | -           | -       | -        | -        | -        | -        | No                      |
| 5                                    | +           | +       | +       | +       | +       | +       | +       | +      | +                  | -           | -       | -        | -        | -        | -        | No                      |
| 6                                    | +           | +       | +       | +       | +       | +       | +       | +      | +                  | +           | +       | +        | +        | +        | +        | Yes (1T-1PS-1BL)        |
| 7                                    | +           | +       | +       | +       | +       | +       | +       | +      | +                  | -           | -       | -        | -        | -        | -        | No                      |
| 8                                    | +           | +       | +       | +       | +       | +       | +       | +      | +                  | -           | -       | -        | -        | -        | -        | No                      |
| 9                                    | -           | -       | -       | -       | -       | -       | -       | -      | -                  | +           | +       | +        | +        | +        | +        | Yes (2T-1PS-1BL)        |
| 10                                   | +           | +       | +       | +       | +       | +       | +       | +      | +                  | -           | -       | -        | -        | -        | -        | No                      |
| 11                                   | +           | +       | +       | +       | +       | +       | +       | +      | +                  | -           | -       | -        | -        | -        | -        | No                      |
| 12                                   | +           | +       | +       | +       | +       | +       | +       | +      | +                  | -           | -       | -        | -        | -        | -        | No                      |
| 13                                   | +           | +       | +       | +       | +       | +       | +       | +      | +                  | +           | +       | +        | +        | +        | +        | Yes (1T-1PS-1BL)        |
| 14                                   | +           | +       | +       | +       | +       | +       | +       | +      | +                  | +           | +       | +        | +        | +        | +        | Yes (1T-1PS-1BL)        |
| 15                                   | -           | -       | -       | -       | -       | -       | -       | -      | -                  | +           | +       | +        | +        | +        | +        | Yes (2T-1PS-1BL)        |
| 16                                   | +           | +       | +       | +       | +       | +       | +       | +      | +                  | +           | +       | +        | +        | +        | +        | Yes (1T-1PS-1BL)        |
| 17                                   | +           | +       | +       | +       | +       | +       | +       | +      | +                  | +           | +       | +        | +        | +        | +        | Yes (1T-1PS-1BL)        |
| 18                                   | +           | +       | +       | +       | +       | +       | +       | +      | +                  | +           | +       | +        | +        | +        | +        | Yes (1T-1PS-1BL)        |
| 19                                   | +           | +       | +       | +       | +       | +       | +       | +      | +                  | +           | +       | +        | +        | +        | +        | Yes (1T-1PS-1BL)        |
| 20                                   | +           | +       | +       | +       | +       | +       | +       | +      | +                  | -           | -       | -        | -        | -        | -        | No                      |
| 21                                   | +           | +       | +       | +       | +       | +       | +       | +      | +                  | +           | +       | +        | +        | +        | +        | Yes (1T-1PS-1BL)        |
| 22                                   | -           | -       | -       | -       | -       | -       | -       | -      | -                  | +           | +       | +        | +        | +        | +        | Yes (2T-1PS-1BL)        |
| 23                                   | +           | +       | +       | +       | +       | +       | +       | +      | +                  | -           | -       | -        | -        | -        | -        | No                      |
| 24                                   | +           | +       | +       | +       | +       | +       | +       | +      | +                  | +           | +       | +        | +        | +        | +        | Yes (1T-1PS-1BL)        |
| 25                                   | +           | +       | +       | +       | +       | +       | +       | +      | +                  | -           | -       | -        | -        | -        | -        | No                      |
| 26                                   | +           | +       | +       | +       | +       | +       | +       | +      | +                  | +           | +       | +        | +        | +        | +        | Yes (1T-1PS-1BL)        |
| 27                                   | +           | +       | +       | +       | +       | +       | +       | +      | +                  | -           | -       | -        | -        | -        | -        | No                      |
| 28                                   | +           | +       | +       | +       | +       | +       | +       | +      | +                  | -           | -       | -        | -        | -        | -        | No                      |
| 29                                   | +           | +       | +       | +       | +       | +       | +       | +      | +                  | -           | -       | -        | -        | -        | -        | No                      |
| 30                                   | +           | +       | +       | +       | +       | +       | +       | +      | +                  | -           | -       | -        | -        | -        | -        | No                      |
| 31                                   | +           | +       | +       | +       | +       | +       | +       | +      | +                  | +           | +       | +        | +        | +        | +        | Yes (1T-1PS-1BL)        |
| 32                                   | +           | +       | +       | +       | +       | +       | +       | +      | +                  | +           | +       | +        | +        | +        | +        | Yes (1T-1PS-1BL)        |
| 33                                   | +           | +       | +       | +       | +       | +       | +       | +      | +                  | -           | -       | -        | -        | -        | -        | No                      |
| 34                                   | -           | -       | -       | -       | -       | -       | -       | -      | -                  | +           | +       | +        | +        | +        | +        | Yes (2T-1PS-1BL)        |
| 35                                   | +           | +       | +       | +       | +       | +       | +       | +      | +                  | +           | +       | +        | +        | +        | +        | Yes (1T-1PS-1BL)        |
| 36                                   | +           | +       | +       | +       | +       | +       | +       | +      | +                  | +           | +       | +        | +        | +        | +        | Yes (1T-1PS-1BL)        |
| 37                                   | -           | -       | -       | -       | -       | -       | -       | -      | -                  | +           | +       | +        | +        | +        | +        | Yes (2T-1PS-1BL)        |

**Table S3:** Cont.

| BC <sub>1</sub> F <sub>2</sub> plant | 1BS markers   |                |                |                |                |                |                |               |                           |                 | 1PS markers    |                 |                 |                 |                         |  | 1PS introgression |
|--------------------------------------|---------------|----------------|----------------|----------------|----------------|----------------|----------------|---------------|---------------------------|-----------------|----------------|-----------------|-----------------|-----------------|-------------------------|--|-------------------|
|                                      | <i>Xgwm11</i> | <i>Xgwm273</i> | <i>Xgwm413</i> | <i>Xwmc619</i> | <i>Xwmc230</i> | <i>Xwmc406</i> | <i>Xwmc798</i> | <i>GluB3a</i> | <i>Xpwp-3000 (Gli-B1)</i> | <i>AgC69174</i> | <i>AgC5870</i> | <i>AgC29588</i> | <i>AgC64023</i> | <i>AgC26797</i> | <i>AgC27774</i>         |  |                   |
| 38                                   | +             | +              | +              | +              | +              | +              | +              | +             | +                         | -               | -              | -               | -               | -               | No                      |  |                   |
| 39                                   | +             | +              | +              | +              | +              | +              | +              | +             | +                         | +               | +              | +               | +               | +               | Yes (1T-1PS-1BL)        |  |                   |
| 40                                   | +             | +              | +              | +              | +              | +              | +              | +             | +                         | +               | +              | +               | +               | +               | Yes (1T-1PS-1BL)        |  |                   |
| 41                                   | +             | +              | +              | +              | +              | +              | +              | +             | +                         | +               | +              | +               | +               | +               | Yes (1T-1PS-1BL)        |  |                   |
| 42                                   | +             | +              | +              | +              | +              | +              | +              | +             | +                         | -               | -              | -               | -               | -               | No                      |  |                   |
| 43                                   | -             | -              | -              | -              | -              | -              | -              | +             | +                         | +               | +              | +               | +               | +               | Yes, RECOMBINANT type 2 |  |                   |
| 44                                   | -             | -              | -              | -              | -              | -              | -              | -             | -                         | +               | +              | +               | +               | +               | Yes (2T-1PS-1BL)        |  |                   |
| 45                                   | +             | +              | +              | +              | +              | +              | +              | +             | +                         | -               | -              | -               | -               | -               | No                      |  |                   |
| 46                                   | +             | +              | +              | +              | +              | +              | +              | +             | +                         | -               | -              | -               | -               | -               | No                      |  |                   |
| 47                                   | -             | -              | -              | -              | -              | -              | -              | -             | -                         | +               | +              | +               | +               | +               | Yes (2T-1PS-1BL)        |  |                   |
| 48                                   | +             | +              | +              | +              | +              | +              | +              | +             | +                         | +               | +              | +               | +               | +               | Yes (1T-1PS-1BL)        |  |                   |
| 49                                   | +             | +              | +              | +              | +              | +              | +              | +             | +                         | +               | +              | +               | +               | +               | Yes (1T-1PS-1BL)        |  |                   |
| 50                                   | +             | +              | +              | +              | +              | +              | +              | +             | +                         | -               | -              | -               | -               | -               | No                      |  |                   |
| 51                                   | +             | +              | +              | +              | +              | +              | +              | +             | +                         | +               | +              | +               | +               | +               | Yes (1T-1PS-1BL)        |  |                   |
| 52                                   | +             | +              | +              | +              | +              | +              | +              | +             | +                         | -               | -              | -               | -               | -               | No                      |  |                   |
| 53                                   | +             | +              | +              | +              | +              | +              | +              | +             | +                         | +               | +              | +               | +               | +               | Yes (1T-1PS-1BL)        |  |                   |
| 54                                   | +             | +              | +              | +              | +              | +              | +              | +             | +                         | +               | +              | +               | +               | +               | Yes (1T-1PS-1BL)        |  |                   |
| 55                                   | +             | +              | +              | +              | +              | +              | +              | +             | +                         | -               | -              | -               | -               | -               | No                      |  |                   |
| 56                                   | +             | +              | +              | +              | +              | +              | +              | +             | +                         | -               | -              | -               | -               | -               | No                      |  |                   |
| 57                                   | +             | +              | +              | +              | +              | +              | +              | +             | +                         | +               | +              | +               | +               | +               | Yes (1T-1PS-1BL)        |  |                   |
| 58                                   | +             | +              | +              | +              | +              | +              | +              | +             | +                         | -               | -              | -               | -               | -               | No                      |  |                   |
| 59                                   | -             | -              | -              | -              | -              | -              | -              | -             | -                         | +               | +              | +               | +               | +               | Yes (2T-1PS-1BL)        |  |                   |
| 60                                   | +             | +              | +              | +              | +              | +              | +              | +             | +                         | +               | +              | +               | +               | +               | Yes (1T-1PS-1BL)        |  |                   |
| 61                                   | +             | +              | +              | +              | +              | +              | +              | +             | +                         | -               | -              | -               | -               | -               | No                      |  |                   |
| 62                                   | +             | +              | +              | +              | +              | +              | +              | +             | +                         | -               | -              | -               | -               | -               | No                      |  |                   |
| 63                                   | +             | +              | +              | +              | +              | +              | +              | +             | +                         | +               | +              | +               | +               | +               | Yes (1T-1PS-1BL)        |  |                   |
| 64                                   | +             | +              | +              | +              | +              | +              | +              | +             | +                         | -               | -              | -               | -               | -               | No                      |  |                   |
| 65                                   | +             | +              | +              | +              | +              | +              | +              | +             | +                         | +               | +              | +               | +               | +               | Yes (1T-1PS-1BL)        |  |                   |
| 66                                   | +             | +              | +              | +              | +              | +              | +              | +             | +                         | -               | -              | -               | -               | -               | No                      |  |                   |
| 67                                   | +             | +              | +              | +              | +              | +              | +              | +             | +                         | -               | -              | -               | -               | -               | No                      |  |                   |
| 68                                   | +             | +              | +              | +              | +              | +              | +              | +             | +                         | +               | +              | +               | +               | +               | Yes (1T-1PS-1BL)        |  |                   |
| 69                                   | +             | +              | +              | +              | +              | +              | +              | +             | +                         | -               | -              | -               | -               | -               | No                      |  |                   |
| 70                                   | +             | +              | +              | +              | +              | +              | +              | +             | +                         | +               | +              | +               | +               | +               | Yes (1T-1PS-1BL)        |  |                   |
| 71                                   | +             | +              | +              | +              | +              | +              | +              | +             | +                         | +               | +              | +               | +               | +               | Yes (1T-1PS-1BL)        |  |                   |
| 72                                   | +             | +              | +              | +              | +              | +              | +              | +             | +                         | +               | +              | +               | +               | +               | Yes (1T-1PS-1BL)        |  |                   |
| 73                                   | +             | +              | +              | +              | +              | +              | +              | +             | +                         | +               | +              | +               | +               | +               | Yes (1T-1PS-1BL)        |  |                   |
| 74                                   | -             | -              | -              | -              | -              | -              | -              | -             | -                         | +               | +              | +               | +               | +               | Yes (2T-1PS-1BL)        |  |                   |

Table S3: Cont.

[illegible]
